# Supplementary material for: A six lipid metabolism related gene signature for predicting the prognosis of hepatocellular carcinoma
Source: PubMed Central journal article supplement (PMC9715694; doi:10.1038/s41598-022-25356-2), 2022-12-01
Supplement: 41598_2022_25356_MOESM2_ESM.pdf [file 41598_2022_25356_MOESM2_ESM.pdf]

**Supplementary Table S1** Online analysis website

---

| website   | URL                                                                                                               |
|-----------|-------------------------------------------------------------------------------------------------------------------|
| TCGA-LIHC | <a href="https://portal.gdc.cancer.gov/">https://portal.gdc.cancer.gov/</a>                                       |
| ICGC      | <a href="https://dcc.icgc.org/">https://dcc.icgc.org/</a>                                                         |
| GSE54236  | <a href="https://www.ncbi.nlm.nih.gov/geo/">https://www.ncbi.nlm.nih.gov/geo/</a>                                 |
| GEPIA     | <a href="http://gepia.cancer-pku.cn/">http://gepia.cancer-pku.cn/</a>                                             |
| GSEA      | <a href="https://www.gsea-msigdb.org/gsea/msigdb/index.jsp">https://www.gsea-msigdb.org/gsea/msigdb/index.jsp</a> |
| TIMER     | <a href="https://cistrome.shinyapps.io/timer/">https://cistrome.shinyapps.io/timer/</a>                           |
| HPA       | <a href="https://www.proteinatlas.org">https://www.proteinatlas.org</a>                                           |

---

**Supplementary Table S2** Primer sequences used in this study.

| Primer name    |   | Sequence (5'-3')                |
|----------------|---|---------------------------------|
| ACC            | F | ATGTCTGGCTTGCACCTAGTA           |
|                | R | CCCCAAAGCGAGTAACAAATTCT         |
| APEX1          | F | AGAGCCAGAGGCCAAGAAGAGTA         |
|                | R | GAAGCCCATCCACATTCCAAGAG         |
| ADH1C          | F | CCCCAAACTTGTGGCTGACTT           |
|                | R | CAGGACGGTACGGATACTCTTT          |
| ME1            | F | CTTCATGCCTGACTGATAT             |
|                | R | GACGTCTCAGGACTTACG              |
| CYP2C9         | F | GGGAAAGUAGAAGAGCAGATGGCCTG      |
|                | R | GGAGACAUGACTCAGCAAATAATAATGCTTT |
| S100A10        | F | CACACCTTGATGCGTCCTCT            |
|                | R | GGCAACCGGATGCAAACAAT            |
| $\beta$ -Actin | F | ATCATGTTTGAGACCTTCAACA          |
|                | R | CATCTCTTGCTCGAAGTCCA            |
